1 PTPN14 Degradation by High-Risk Human Papillomavirus E7 Limits Keratinocyte Differentiation  
2 and Contributes to HPV-Mediated Oncogenesis

3

4 Joshua Hatterschide<sup>1</sup>, Amelia E. Bohidar<sup>1</sup>, Miranda Grace<sup>2</sup>, Tara J. Nulton<sup>3</sup>, Brad Windle<sup>3</sup>, Iain  
5 M. Morgan<sup>3</sup>, Karl Munger<sup>2</sup>, Elizabeth A. White<sup>1\*</sup>

6

7 <sup>1</sup>Department of Otorhinolaryngology: Head and Neck Surgery, University of Pennsylvania  
8 Perelman School of Medicine, Philadelphia, PA, USA

9

10 <sup>2</sup>Department of Developmental, Molecular and Chemical Biology, Tufts University School of  
11 Medicine, Boston, MA, USA

12

13 <sup>3</sup>Philips Institute for Oral Health Research, Department of Oral and Craniofacial Molecular  
14 Biology, Virginia Commonwealth University School of Dentistry, Richmond, VA, USA

15

16 \* Correspondence:  
17 Elizabeth A. White  
18 Department of Otorhinolaryngology: Head and Neck Surgery  
19 Department of Microbiology  
20 University of Pennsylvania Perelman School of Medicine  
21 3610 Hamilton Walk  
22 Philadelphia PA 19104  
23 Phone: 215-746-6380  
24 Email: eawhite@pennmedicine.upenn.edu

25

26 Short Title: HPV E7 Degrades PTPN14 to Limit Differentiation

27

28 Classification: Biological Sciences / Microbiology

29 Keywords: Virus, Transformation, Epithelial, Differentiation, HPV

30 **Abstract**

31 High-risk human papillomavirus (HPV) E7 proteins enable oncogenic transformation of HPV-  
32 infected cells by inactivating host cellular proteins. High-risk but not low-risk HPV E7 target  
33 PTPN14 for proteolytic degradation, suggesting that PTPN14 degradation may be related to  
34 their oncogenic activity. HPV infects human keratinocytes but the role of PTPN14 in  
35 keratinocytes and the consequences of PTPN14 degradation are unknown. Using an HPV16  
36 E7 variant that can inactivate RB1 but cannot degrade PTPN14 we found that high-risk HPV E7-  
37 mediated PTPN14 degradation impairs keratinocyte differentiation. Deletion of *PTPN14* from  
38 primary human keratinocytes decreased keratinocyte differentiation gene expression. Related to  
39 oncogenic transformation, both HPV16 E7-mediated PTPN14 degradation and *PTPN14* deletion  
40 promoted keratinocyte survival following detachment from a substrate. PTPN14 degradation  
41 contributed to high-risk HPV E6/E7-mediated immortalization of primary keratinocytes and HPV-  
42 positive but not HPV-negative cancers exhibit a gene expression signature consistent with  
43 PTPN14 inactivation. We find that PTPN14 degradation impairs keratinocyte differentiation and  
44 propose that this contributes to high-risk HPV E7-mediated oncogenic activity independent of  
45 RB1 inactivation.

46

47 **Significance Statement**

48 Human papillomaviruses uncouple proliferation from differentiation in order to enable virus  
49 replication in epithelial cells. HPV E7 proteins are well established to promote proliferation by  
50 binding to and inactivating retinoblastoma family proteins and other cell cycle inhibitors.  
51 However, mechanisms by which high-risk HPV oncoproteins inhibit differentiation have not been  
52 defined. This paper identifies the first mechanism by which high-risk HPV E7 inhibit keratinocyte  
53 differentiation. The inhibition of differentiation requires degradation of the cellular protein  
54 PTPN14 by high-risk HPV E7 and this degradation is related to the ability of high-risk HPV  
55 oncoproteins to immortalize keratinocytes and to cause cancer.

56

## 57 **Introduction**

58 Human papillomaviruses (HPVs) are non-enveloped, double-stranded DNA viruses that  
59 infect and replicate in the stratified squamous epithelium. HPV initially infects keratinocytes in  
60 the basal, proliferative layer of the epidermis, and subsequent steps in the HPV replicative cycle  
61 including viral genome amplification, encapsidation, and egress are dependent on keratinocyte  
62 differentiation (1-3). However, HPV genome amplification also requires components of the  
63 cellular machinery for DNA replication that are not expressed in differentiating cells. Thus,  
64 productive HPV infection must uncouple proliferation and differentiation in the epithelium.  
65 Infection with one of the 13-15 'high-risk' HPV causes nearly all cervical cancer, some other  
66 anogenital cancer, and an increasing proportion of HPV-positive head and neck squamous cell  
67 carcinomas (HNSCC) (4-6). In total, HPV infection causes ~5% of cancers worldwide.

68 The high-risk HPV E7 oncoprotein is able to immortalize human keratinocytes and the  
69 efficiency of immortalization is increased by high-risk HPV E6 (7-9). A well-characterized activity  
70 of many HPV E7 is to bind and inactivate the retinoblastoma tumor suppressor (RB1) via the  
71 LxCxE motif present in E7 conserved region 2 (CR2) (10-12). In addition, HPV16 E7 can direct  
72 the proteasome-mediated degradation of RB1 (13-16). RB1 inactivation releases the inhibition  
73 of E2F transcription factors, thus allowing cell cycle progression and acting as a major driver of  
74 proliferation. HPV E7 also promote proliferation by inhibiting the CDK inhibitors p21<sup>WAF1/CIP1</sup> and  
75 p27<sup>KIP1</sup> (17-19). In addition to promoting proliferation, transcriptional studies indicate that human  
76 cells harboring high-risk HPV genomes express lower levels of differentiation marker genes and  
77 that both high-risk HPV E6 and E7 likely contribute to this repression (20-26). However, a  
78 mechanism by which high-risk HPV E6 and/or E7 inhibit differentiation has not been defined.

79 RB1 binding by HPV E7 is necessary but insufficient for immortalization and  
80 transformation, and several observations highlight the need for other contributors to  
81 transformation. First, in multiple assays, the oncogenic activity of high-risk HPV E7 is disrupted

82 by mutations in regions that do not include the LxCxE motif (27-31). Second, low-risk HPV E7  
83 bind RB1 but do not have activity in transformation assays and other E7 such as HPV1 E7 bind  
84 RB1 with high affinity but do not transform (32-34). Finally, bovine papillomavirus (BPV) E7  
85 does not bind to RB1, but in some assays it is required for BPV-mediated transformation (30,  
86 35-37). The idea that RB1 inactivation is insufficient for transformation is additionally supported  
87 by studies in mouse models of cervical cancer (38, 39). Overall, updates to the model of  
88 transformation by HPV E6 and E7 have been suggested (40) and additional binding partners of  
89 E7 have been proposed to mediate transformation independent of RB1 binding (41-43).  
90 However not all of these interactions are conserved among the high-risk HPV E7.

91 The E3 ubiquitin ligase UBR4 is a conserved interactor of diverse papillomavirus E7  
92 (44). UBR4 is required by both HPV16 E7 and BPV E7 for RB1-independent transformation but  
93 for some years the reason for this requirement was unknown (45, 46). Recently we discovered  
94 that the cellular protein PTPN14 binds to HPV E7 proteins from diverse HPV genotypes and that  
95 high-risk HPV E7 use UBR4 to direct PTPN14 for proteasome-mediated degradation. Although  
96 low-risk HPV E7 also bind UBR4, only high-risk HPV E7 mediate PTPN14 degradation, and E7  
97 binding to PTPN14 and to UBR4 does not require interaction with RB1 (44, 47).

98 PTPN14 is a non-receptor protein tyrosine phosphatase that is evolutionarily conserved  
99 as a regulator of developmental signaling from *Drosophila* to humans, however phenotypes  
100 associated with PTPN14 loss vary (48-52). Hereditary variations in human *PTPN14* are  
101 associated with developmental disorders including dysregulated angiogenesis, improper  
102 lymphatic development and improper choanal development (48, 51). Mutations in human  
103 cancer have implicated PTPN14 as a putative tumor suppressor (53-56). *PTPN14* is mutated in  
104 cancers such as colorectal cancer and basal cell carcinoma and in both cancer types mutations  
105 occur along the length of the gene (54, 57). Several potential substrates for dephosphorylation  
106 by PTPN14 are related to cell growth control (53, 56, 58). PTPN14 also has phosphatase  
107 independent activities such as the ability to regulate Hippo signaling through direct interaction

108 with YAP1 or with its upstream regulators LATS1/2 (55, 59-61). These interactions are mediated  
109 through central PPxY motifs in PTPN14.

110         Based upon the observations that the ability of E7 to degrade PTPN14 correlates with  
111 E7 oncogenic activity, that the regions of high-risk HPV E7 required for PTPN14 degradation  
112 are the same as those that confer RB1-independent transforming activity, and that *PTPN14* is a  
113 putative tumor suppressor, we hypothesized that PTPN14 degradation could be required for  
114 high-risk HPV E7-mediated oncogenic transformation. The biological activities of PTPN14 in  
115 keratinocytes have not been studied, and the molecular consequences of PTPN14 degradation  
116 by high-risk HPV E7 have not been defined. Here we report that PTPN14 loss impaired the  
117 differentiation program in human keratinocytes and that HPV16 E7 could inhibit the expression  
118 of differentiation marker genes in response to stimulus. This inhibition was dependent upon  
119 HPV16 E7's ability to degrade PTPN14 and was retained in the absence of RB1 binding.  
120 Moreover, the ability of E7 to degrade PTPN14 contributed to the immortalization of primary  
121 human keratinocytes by HPV16 E6 and E7. Repression of differentiation is a potentially  
122 oncogenic event and we found that repression of keratinocyte differentiation describes the major  
123 gene expression differences between HPV+ and HPV- HNSCC. Taken together, our results  
124 suggest that high-risk E7 mediated PTPN14 degradation impairs keratinocyte differentiation.  
125 This is an RB1-independent, and potentially oncogenic, activity of high-risk HPV E7.

126

## 127 **Results**

128 **The HPV16 E7 E10K variant is impaired in PTPN14 degradation but binds RB1 and**  
129 **promotes E2F target gene expression.**

130         PTPN14 degradation by high-risk HPV E7 requires the E3 ubiquitin ligase UBR4, which  
131 interacts with the N-terminus of E7. PTPN14 binding maps broadly to the E7 C-terminus (Figure  
132 1A). The recent identification of HPV16 E7 variants from over 5000 patient samples (62)  
133 prompted us to test whether an N-terminal variant might be impaired in the ability to degrade

134 PTPN14. One variant, HPV16 E7 E10K (glutamic acid to lysine change at amino acid 10), is  
135 altered in the region that is required for binding to UBR4. To assess the biological activities of  
136 this E7 variant we used hTert-immortalized human foreskin keratinocytes (N/Tert-1) (63) to  
137 establish cell lines that stably express Flag and HA epitope tagged versions of the prototypical  
138 HPV16 E7 (WT), the HPV16 E7 E10K variant, HPV16 E7  $\Delta$ 21-24, or an empty vector control.  
139 The  $\Delta$ 21-24 deletion eliminates the LxCxE motif that is required for E7 to bind to RB1 (12).  
140 HPV16 E7 cells exhibited reduced PTPN14 protein levels and binding to RB1 was not required  
141 for this effect (Figure 1B). However, HPV16 E7 E10K did not promote the reduction in steady-  
142 state PTPN14 protein levels. UBR4 did not co-immunoprecipitate with the HPV16 E7 E10K  
143 variant (Figure 1B), suggesting that this variant cannot target PTPN14 for degradation because  
144 it is deficient in binding to the required E3 ubiquitin ligase. HPV16 E7 E10K was comparable to  
145 HPV16 E7 WT in its ability to bind RB1 (Figure 1B). In primary human foreskin keratinocytes  
146 (HFK) stably transduced with the same retroviral vectors, both HPV16 E7 WT and HPV16 E7  
147 E10K could induce the expression of E2F target genes *CCNE1* and *MCM2* (Figure 1C). This  
148 supported the notion that UBR4 binding and PTPN14 degradation by HPV16 E7 is independent  
149 of RB1 binding and established HPV16 E7 E10K as a variant that is RB1 binding/degradation  
150 competent but cannot degrade PTPN14.

151

### 152 **HPV16 E7 degrades PTPN14 to inhibit keratinocyte differentiation.**

153 To determine whether HPV16 E7 has effects on cellular gene expression that are  
154 dependent on its ability to degrade PTPN14, we performed an unbiased analysis of gene  
155 expression in keratinocytes expressing HPV16 E7 variants. Duplicate or triplicate primary HFK  
156 cell populations were established by transduction with retroviral vectors encoding HPV16 E7  
157 WT, HPV16 E7 E10K, and HPV16 E7  $\Delta$ 21-24 and selected with puromycin. Total RNA was  
158 isolated from independent cell populations then polyA selected RNA was subjected to RNA-seq.  
159 As predicted by our initial validation of the E10K variant, HPV16 E7 E10K behaved like HPV16

160 E7 WT with respect to the upregulation of DNA replication genes and had a comparable effect  
161 on genes related to RB1 binding (Supplemental Table 1 and Supplemental Figure 1).

162 Next, we assessed the differences between HPV16 E7 WT and HPV16 E7 E10K.  
163 Seventy-five genes were differentially regulated in HPV16 E7 E10K cells compared to HPV16  
164 E7 WT cells with fold change  $\geq 1.5$  and adjusted  $p$ -value  $\leq 0.05$ . Approximately half of these  
165 differentially-regulated genes were repressed more by HPV16 E7 WT than by HPV16 E7 E10K.  
166 Gene ontology (GO) enrichment analysis showed that the genes repressed by HPV16 E7  
167 dependent on its ability to degrade PTPN14 were described by developmental GO terms that  
168 are related to the keratinocyte differentiation program (Figure 2A). These included epithelial cell  
169 differentiation, cornification, keratinocyte differentiation, epidermis development, epidermal cell  
170 differentiation, and keratinization. Many of the individual genes that were repressed by HPV16  
171 E7 but not by HPV16 E7 E10K are differentiation markers (Figure 2B, y-axis). In contrast, genes  
172 that were activated by HPV16 E7 dependent on its ability to degrade PTPN14 were not  
173 significantly enriched for any GO terms (Supplemental Figure 2A).

174 To test whether repression of keratinocyte differentiation was related to RB1 inactivation  
175 we used HPV16 E7  $\Delta 21-24$  to assess the transcriptional impact of E7 in the absence of RB1  
176 binding. As expected, cell cycle and DNA replication related GO categories were the most  
177 significantly enriched categories among genes differentially regulated by HPV16 E7 WT versus  
178 HPV16 E7  $\Delta 21-24$  (Figure 2C, Top). In contrast, comparing HPV16 E7  $\Delta 21-24$  to empty vector  
179 control identified the genes that are repressed by HPV16 E7 independent of RB1 binding  
180 (Figure 2C, Bottom). GO analysis of these genes identified the same keratinocyte  
181 differentiation-related gene sets that were seen in our analysis of PTPN14 degradation  
182 dependent effects of HPV16 E7. Furthermore, individual genes repressed by HPV16 E7  $\Delta 21-24$   
183 relative to control (Supplemental Figure 2C, y-axis) are similar to those repressed by HPV16 E7  
184 WT dependent on its ability to degrade PTPN14. We concluded that repression of keratinocyte  
185 differentiation through the degradation of PTPN14 was independent of RB1 binding. In the

186 absence of RB1 binding HPV16 E7 acted mainly as a repressor but retained a modest ability to  
187 promote gene expression (Supplemental Figure 2B).

188 To better understand the impacts of PTPN14 degradation on gene expression, we  
189 examined individual genes significantly lower in HPV16 E7 WT cells than in HPV16 E7 E10K  
190 cells. Many of the genes that are repressed by HPV16 E7 WT and HPV16 E7  $\Delta$ 21-24 but not by  
191 HPV16 E7 E10K are described by epidermis development and more specific GO terms  
192 (Supplemental Figure 2D, Supplemental Table 2). Although certain genes were not repressed  
193 by either HPV16 E7 E10K or HPV16 E7  $\Delta$ 21-24, these genes were largely related to other  
194 biological processes.

195 To validate the results obtained from RNA-seq, we used qRT-PCR to confirm the altered  
196 expression of several genes related to keratinocyte differentiation in our cell lines. Markers of  
197 keratinocyte differentiation such as keratin 1 (KRT1), keratin 4 (KRT4), keratin 10 (KRT10),  
198 keratin 16 (KRT16), involucrin (IVL), and desmocollin 1 (DSC1) were repressed by HPV16 E7  
199 by 1.5- to 12-fold (Figure 2D). KRT1, KRT4, KRT10, and KRT16 are cytokeratins associated  
200 with the suprabasal layers of differentiating keratinocytes. IVL constitutes a major component of  
201 the cornified envelope and is expressed at high levels in the upper layers of the epidermis.  
202 DSC1 is a component of desmosome complexes associated with keratinization and is  
203 expressed at higher levels in the upper spinous layer and granular layer of the epidermis.  
204 Comparison of both HPV16 E7 WT and  $\Delta$ 21-24 to the HPV16 E7 E10K variant indicated that  
205 the ability of HPV16 E7 to repress expression of these genes was at least partially dependent  
206 on its ability to target PTPN14 for degradation.

207

208 **The ability of E7 to degrade PTPN14 correlates with its ability to inhibit differentiation**  
209 **and promote survival upon detachment.**

210 Next, we wanted to determine whether the ability of HPV E7 to alter differentiation-  
211 related gene expression in unstimulated cells correlated with changes following a differentiation



212 stimulus. *In vivo*, detachment from the basement membrane stimulates keratinocyte  
213 differentiation, an effect that can be mimicked by growth of cultured cells in suspension (64-66).  
214 HPV E7 has been previously shown to protect against cell death following detachment in a  
215 UBR4-dependent manner (46, 67). In these experiments we used N/Tert-1 cells engineered to  
216 stably express HPV16 E7 WT, HPV16 E7 E10K, HPV6 E7, or an empty vector control. HPV6 is  
217 a low-risk HPV encoding an E7 that, like HPV16 E7 E10K, binds PTPN14 but does not direct it  
218 for proteasome-mediated degradation. Using immortalized cells in these experiments enabled  
219 propagation of sufficient numbers of cells for detachment assays.

220 N/Tert-1 cells were harvested directly from adherent culture or subjected to growth in  
221 suspension for 12h to induce differentiation. KRT16 and IVL RNAs were analyzed by qRT-PCR  
222 and were induced by detachment in all of the cell lines tested. Detached empty vector cells  
223 expressed 7- to 30-fold more of these transcripts compared to adherent cells and each version  
224 of E7 limited the induction of KRT16 and IVL. KRT16 and IVL expression was 2.3- or 3.4-fold  
225 lower in N/Tert-HPV16 E7 WT cells compared to the empty vector control and repression of IVL  
226 was statistically significant (Figure 3A). The statistical significance of some other comparisons  
227 was limited by the fact that there was a wide range of induction of the differentiation markers  
228 following detachment. However, the trend was highly reproducible: in three replicate  
229 experiments HPV16 E7 WT always repressed differentiation marker gene expression more than  
230 HPV16 E7 E10K and HPV6 E7. These results indicate that PTPN14 degradation is required for  
231 maximal repression of detachment-induced differentiation by HPV16 E7.

232 Several explanations could account for the observation that E7 that do not degrade  
233 PTPN14 still partially repress differentiation. Each of the E7 tested here bind and inactivate RB1  
234 and it is possible that some inhibition of differentiation is due to the increased proliferation  
235 resulting from RB1 inactivation. Another, not mutually exclusive, explanation could be that  
236 PTPN14 binding alone is enough to result in some inhibition of differentiation. Our data support

237 this idea, since HPV16 E7 E10K and HPV6 E7 both interact with PTPN14 and they repressed  
238 differentiation to similar levels.

239 In addition to stimulating differentiation, growth in suspension activates the Hippo  
240 signaling pathway (68, 69) which represses the transcription of the well characterized  
241 YAP/TEAD targets *CTGF* and *CYR61*. PTPN14 knockdown in MCF10A cells has been shown  
242 to induce the transcription of *CTGF* and *CYR61* (59). Since PTPN14 has been characterized as  
243 a negative regulator of YAP1 and shown to regulate *CTGF* and *CYR61* in other cell types (55,  
244 59-61), we measured these transcripts to determine whether E7 differentially impacts their  
245 expression. Compared to vector controls, none of the E7 cell lines exhibited altered expression  
246 of these YAP1/TEAD targets before or after detachment (Figure 3B).

247 To further assess cell viability in the detachment experiment, 1,000 cells were taken  
248 from suspension culture, re-plated in coated tissue culture plates, and allowed to grow for 5d.  
249 HPV16 E7 protected against cell death following detachment in a manner that was dependent  
250 on the ability of E7 to target PTPN14 for degradation (Figure 3C). This is consistent with  
251 previous reports demonstrating that HPV16 E7 and BPV E7 require UBR4 to protect cells  
252 against cell death triggered following detachment from a substrate (46, 67).

253

#### 254 **PTPN14 knockout limits differentiation gene expression in primary human keratinocytes.**

255 To test what cellular processes are affected when PTPN14 levels are reduced in human  
256 keratinocytes, we performed an unbiased analysis of gene expression in the presence and  
257 absence of PTPN14. Primary HFK were transduced with lentiviral vectors encoding SpCas9  
258 plus an sgRNA targeting PTPN14 (sgPTPN14-3) or a nontargeting control sgRNA (sgNT-2),  
259 then selected with puromycin to generate control (HFK-control) and PTPN14-deleted (HFK-  
260 PTPN14 KO) cell lines (Figure 4A). Total RNA was isolated from two or three independent  
261 isolates of HFK-control and HFK-PTPN14 KO, then polyA selected RNA was subjected to RNA-  
262 seq. In cells that did not express *PTPN14*, 141 genes were differentially regulated with fold

263 change  $\geq 1.5$  and adjusted  $p$ -value  $\leq 0.05$ . Of these 29 genes were up-regulated and 112 were  
264 down-regulated in the absence of PTPN14 (Figure 4B and Supplemental Table 3). Thus,  
265 PTPN14 appeared to act largely to promote, rather than to repress, gene expression. As in the  
266 analysis of the HPV16 E7 variants, keratinocyte differentiation-related GO terms were  
267 downregulated in PTPN14 KO cells (Figure 4C, Figure 2A and C). More than half of the down-  
268 regulated genes were in epidermis development-related or other developmental process-related  
269 GO categories (Figure 4D). There was not a corresponding enrichment in differentiation-related  
270 GO terms among the up-regulated genes; however, one GO category, inflammatory response,  
271 was significantly enriched in this analysis (Supplemental Figure 3).

272 We hypothesized that individual genes might be similarly regulated by PTPN14 KO and  
273 E7-mediated PTPN14 degradation. Indeed, the genes that were both downregulated by  
274 PTPN14 loss and downregulated by HPV16 E7 WT in a PTPN14 degradation-dependent  
275 manner are involved in keratinocyte differentiation (Figure 2B). Furthermore, gene expression  
276 changes induced by HPV16 E7  $\Delta 21-24$  are positively correlated with those resulting from  
277 PTPN14 KO (Supplemental Figure 2C). Taken together, gene expression analysis of HFK-  
278 PTPN14 KO and cells expressing HPV16 E7 variants is consistent with degradation of PTPN14  
279 by HPV16 E7 acting to inhibit keratinocyte differentiation. Our data suggest that PTPN14  
280 degradation mediates the predominant RB-independent effect of HPV16 E7 on gene  
281 expression.

282 We selected a subset of genes for validation by qRT-PCR. In agreement with the RNA-  
283 seq results, markers of keratinocyte differentiation such as *KRT1*, *KRT4*, *KRT10*, *KRT16*, *IVL*,  
284 and *DSC1* were expressed at 3- to 12-fold lower levels in the absence of PTPN14 (Figure 4E).  
285 Transcription factors (TFs) such as MAF, MAFB, and GRLH3 that are transcriptionally regulated  
286 during progression of the keratinocyte differentiation program (70-74) exhibited lower  
287 expression in the absence of PTPN14 (Figure 4F). Unlike the published effects in other cell  
288 types, we found that PTPN14 loss did not impact the expression of the well-characterized

289 YAP/TEAD targets *CTGF* and *CYR61* (Figure 4G). These data support the idea that PTPN14  
290 loss impairs the regulation of keratinocyte differentiation but does not affect expression of  
291 canonical Hippo regulated genes in primary HFK.

292

### 293 **PTPN14 contributes to the upregulation of differentiation markers upon detachment.**

294 Having determined that PTPN14 loss reduces the basal expression of keratinocyte  
295 differentiation-related genes, we next tested whether PTPN14 loss alters the cellular response  
296 to a differentiation stimulus. We used CRISPR-Cas9 gene editing in N/Tert-1 cells to engineer  
297 control (N/Tert-mock) or PTPN14-deleted (N/Tert-PTPN14 KO) pooled stable cell lines. Again,  
298 we stimulated these cells to differentiate through growth in low adherence plates for 12h.  
299 Consistent with the effect in primary cells, PTPN14 KO reduced the expression of *KRT16* and  
300 *IVL* in adherent cells. We further found that PTPN14 loss also impaired the expression of  
301 *KRT16* and *IVL* upon the induction of differentiation (Figure 5A), mirroring the results observed  
302 in our N/Tert-E7 cells. As we observed in the N/Tert-E7 cells as well as the primary HFK-  
303 PTPN14 KO cells, N/Tert-PTPN14 KO cells did not express significantly more *CTGF* or *CYR61*  
304 than mock controls in either the adherent condition or following growth in suspension (Figure  
305 5B).

306 Finally, we used cell growth after re-plating as a measure of viability after detachment.  
307 The N/Tert-PTPN14 KO cells exhibited improved survival and colony formation after  
308 detachment compared to control cells (Figure 5C). This is consistent with the result that HPV E7  
309 expression improved survival after suspension in a PTPN14 degradation-dependent manner  
310 (Figure 3C) and indicates that loss of PTPN14 is sufficient to improve survival of keratinocytes  
311 after detachment.

312

313 **PTPN14 degradation contributes to E6/E7 immortalization of primary human**  
314 **keratinocytes.**

315 Coexpression of HPV16 E6 and E7 can efficiently immortalize primary keratinocytes in  
316 cell culture. To determine whether PTPN14 degradation is required for immortalization by  
317 HPV16 oncoproteins, primary HFK were transduced with pairs of HPV E6/E7-encoding  
318 retroviruses, selected with puromycin and blasticidin, and monitored for cell growth over the  
319 next 17 passages - equivalent to 75 days for WT HPV16 E6/E7 cells (Figure 6).

320 Primary HFK transduced with HPV6 E6/E7 or with empty vector controls rapidly  
321 senesced, while cells transduced with HPV16 E6/E7 were immortalized in 3/3 replicate  
322 experiments. The cells transduced with HPV16 E6/E7  $\Delta$ 21-24 retroviruses were severely growth  
323 impaired and were not immortalized but exhibited a small degree of lifespan extension, perhaps  
324 due to sporadic epigenetic inactivation of RB1. Cells transduced with HPV16 E6/E7 E10K  
325 expressing vectors retained some proliferative capacity, but their growth was reproducibly  
326 impaired compared to that of HPV16 E6/E7 WT cells. We hypothesize that these cells are not  
327 fully immortalized and that both RB1 inactivation and PTPN14 degradation are required for  
328 immortalization of primary HFK by HPV E6 and E7.

329

### 330 **Keratinocyte differentiation gene expression describes the major differences between** 331 **HPV+ and HPV- HNSCC.**

332 The changes in differentiation-related gene expression in HPV E7-expressing cell lines  
333 appeared to be dependent on the ability of E7 to degrade PTPN14 and to reflect the same  
334 changes that result from PTPN14 loss in primary HFK. The ability of E7 to degrade PTPN14  
335 also correlates with its ability to immortalize primary HFK. We wished to determine whether E7-  
336 or PTPN14-dependent changes in differentiation-related gene expression are reflected in HPV-  
337 associated cancers. Using RNA-seq data from the Cancer Genome Atlas (TCGA) we examined  
338 gene expression signatures in 508 HNSCC samples, 60 of which are HPV-positive and 448  
339 HPV-negative (75-77). Genes that were differentially expressed by 3-fold or more in HPV-  
340 positive vs. HPV-negative samples were selected for further analysis.

341 Strikingly, the most enriched GO terms among genes downregulated in HPV+ cancers  
342 relative to HPV- cancers were epidermis development, keratinocyte differentiation, and  
343 epidermal cell differentiation (Figure 7A). As in the PTPN14 knockout cells and in the presence  
344 of HPV16 E7, downregulated genes reflected a keratinocyte differentiation signature.  
345 Furthermore, many of the other highly enriched GO terms were related to more general  
346 developmental processes. In total, epidermis development and other developmental processes  
347 accounted for about one-third of the differentially regulated genes in HPV-positive vs. HPV-  
348 negative HNSCC. In contrast GO enrichment identified no clear gene sets enriched among  
349 genes upregulated in HPV-positive compared to HPV-negative HNSCC (Supplemental Figure  
350 4). The downregulation of differentiation-related genes in HPV-positive relative to HPV-negative  
351 cancers is consistent with the changes in gene expression induced by the high-risk HPV E7-  
352 mediated degradation of PTPN14.

353

## 354 **Discussion**

355 Our previous finding that PTPN14 is targeted for degradation by high-risk HPV E7 but  
356 not by low-risk HPV E7 suggested that PTPN14 loss might be related to the biology of the high-  
357 risk HPV (47). PTPN14 is a candidate tumor suppressor based on the observation that it is  
358 mutated in some cancers (54, 57, 78-81). The targeted degradation of PTPN14 by high-risk  
359 HPV E7 requires the E3 ubiquitin ligase UBR4 and the interaction of UBR4 with papillomavirus  
360 E7 is required for E7 to transform cells (45, 46). Thus, PTPN14 degradation could be analogous  
361 to the well-established ability of high-risk HPV E6 but not low-risk HPV E6 to target p53 for  
362 proteasome-mediated degradation using the E3 ubiquitin ligase UBE3A (82, 83). However,  
363 neither our previous studies nor those from another group provided insight regarding the  
364 downstream effects of E7-mediated PTPN14 degradation in human keratinocytes (47, 84).

365 PTPN14 has been implicated as a negative regulator of YAP1, a transcriptional  
366 coactivator that is regulated by the Hippo signaling pathway (59, 61, 85). An appealing

367 hypothesis was that E7-mediated PTPN14 degradation would activate YAP1 and promote the  
368 expression of pro-proliferative YAP target genes such as *CTGF* and *CYR61*. However, we have  
369 not identified any cell type in which high-risk HPV E7 expression causes an increase in *CTGF* or  
370 *CYR61* RNA. In addition, we found that depletion or knockout of PTPN14 in human  
371 keratinocytes did not cause *CTGF* or *CYR61* upregulation (Figures 4 and 5). However, our cell  
372 detachment experiments suggested that these genes are indeed regulated by Hippo signaling in  
373 keratinocytes (Figure 5). Thus, our results suggest that PTPN14 may not regulate Hippo-YAP  
374 signaling in keratinocytes.

375 In the absence of support for this initial hypothesis, we took an unbiased approach to  
376 determine the effect of high-risk HPV E7-mediated PTPN14 degradation in keratinocytes. By  
377 using an HPV16 E7 variant that cannot degrade PTPN14 (Figures 1 and 2) and by directly  
378 testing the effect of *PTPN14* knockout in primary HFK (Figure 4), we determined that PTPN14  
379 loss results in a downregulation of several markers of epidermal cell differentiation. Consistent  
380 with this idea, *PTPN14* appears to be a target of regulation by p53 in mouse cells, but is likely a  
381 p63 target in human cells (79, 86-88). p63 is a master regulator of epidermal development (89).  
382 The link between PTPN14 and differentiation directly connected PTPN14 degradation to HPV  
383 biology.

384 To further test how high-risk HPV E7-mediated PTPN14 degradation affects processes  
385 related to epidermal cell differentiation, we used a keratinocyte detachment and re-plating assay  
386 (Figure 3). Our studies indicated that high-risk HPV E7 inhibit the expression of differentiation  
387 markers following cell detachment in a PTPN14 degradation-dependent manner. The same  
388 inhibition of differentiation markers occurred in detached PTPN14 knockout primary HFK (Figure  
389 5). Anoikis is cell death triggered by detachment from a substrate and the ability to survive  
390 anoikis and proliferate in the absence of contact with the basement membrane is a hallmark of  
391 cancer cells. The E7 proteins that inhibited differentiation marker gene expression promoted cell  
392 survival following detachment and this correlated with the ability to degrade PTPN14 (Figure 3).



393 In support of the notion that E7 mediated PTPN14 degradation contributes to oncogenic  
394 transformation, our subsequent experiments indicated that PTPN14 degradation by high-risk  
395 HPV contributes to keratinocyte immortalization. Primary keratinocytes were fully immortalized  
396 by HPV16 E6/E7 but not by HPV16 E6/E7 E10K (Figure 6). In transcriptional profiles of human  
397 head and neck cancer samples, changes in gene expression consistent with PTPN14 loss were  
398 reflected in HPV-positive but not HPV-negative cancers (Figure 7). Strikingly, we found that the  
399 gene ontology terms related to keratinocyte differentiation and epidermis development  
400 described both the PTPN14-dependent differential gene expression in primary cells and the  
401 most significant differences between HPV-positive and HPV-negative head and neck  
402 carcinomas. We also observed that in previously published data these same GO terms were  
403 downregulated by the co-expression of HPV16 E6 and E7 in primary HFKs (90). These findings  
404 are consistent with the effect of PTPN14 loss being maintained throughout HPV-mediated  
405 carcinogenesis. Notably, the HPV16 E7 E10K variant that cannot bind UBR4 or degrade  
406 PTPN14 (Figure 3) was identified in a CIN3 lesion (62). We hypothesize that other patient-  
407 specific genetic or epigenetic changes may have compensated for the inability of E7 to degrade  
408 PTPN14 in this lesion, however only viral sequence information was collected from the patient  
409 samples in this study. Alternatively, this mutation may have impaired the progression of this  
410 lesion from CIN3 to a malignant cancer.

411 Some previous studies suggested that differentiation inhibition by E7 could be RB/E2F-  
412 dependent. E2F transcription factors have been shown to limit keratinocyte differentiation (91)  
413 and both the RB1-binding domain and the N-terminus of HPV16 E7 contributed to HPV-  
414 mediated differentiation inhibition in one study (20). However, our unbiased transcriptional  
415 analysis clearly showed that much of the E7-mediated repression of differentiation is  
416 independent of RB binding. Here we have focused on the genes repressed by HPV16 E7, which  
417 includes many markers of keratinocyte differentiation that were also downregulated upon  
418 PTPN14 knockout (Figures 2 and 4). Using the HPV16 E7  $\Delta$ 21-24 mutant we have found that



419 RB1 binding is not required for the repression of most of these genes (Figure 2). RB1 binding  
420 did allow for the repression of some differentiation genes by HPV16 E7 (Supplemental Figure  
421 2D) and certain genes upregulated by HPV16 E7 but not by HPV16 E7  $\Delta$ 21-24 were related to  
422 keratinocyte differentiation. Nonetheless, differentiation-related GO terms comprised a minor  
423 part of the HPV16 E7 gene induction signature whereas they were the most significant terms  
424 repressed by HPV16 E7 in the presence or absence of RB1 binding.

425 All HPVs, not only the high-risk types, likely manipulate differentiation in order to  
426 replicate. PTPN14 is a conserved interactor of HPV E7 suggesting an evolutionary pressure to  
427 maintain this interaction regardless of the ability to direct it for proteasomal degradation. Our  
428 future studies will address whether low-risk HPV E7 impact keratinocyte differentiation via their  
429 ability to bind to (but not degrade) PTPN14. Our study supports this hypothesis as the HPV16  
430 E7 E10K variant and the low-risk HPV6 E7 proteins both bind PTPN14 without directing it for  
431 degradation and both inhibited keratinocyte differentiation to similar levels after detachment  
432 (Figure 5). More broadly, genus beta HPV E6 proteins bind MAML1 to inhibit Notch signaling,  
433 resulting in impaired keratinocyte differentiation and a cellular environment more conducive to  
434 virus replication (92-94). The genus alpha HPVs, which include all of the high-risk and low-risk  
435 HPV discussed here, do not engage MAML1 in the same way. It is interesting to speculate that  
436 all HPV promote proliferation but that pathogenesis is related to their ability to further impair  
437 differentiation: via the E7-PTPN14 interaction in the case of mucosal, genus alpha HPV and via  
438 the E6-MAML interaction in the case of cutaneous, genus beta HPV.

439 The binding and degradation of RB1 is a major component of high-risk HPV E7-  
440 mediated transformation. However, many observations have suggested that there must be RB1-  
441 independent contributions to E7-mediated transformation. We propose that PTPN14  
442 degradation is a critical contributor to the oncogenic activity of high-risk HPV E7 and that  
443 PTPN14 inactivation impairs keratinocyte differentiation. PTPN14 degradation is conserved  
444 across the high-risk HPV E7 that we have tested so far and it is not dependent on the ability of

445 E7 to bind or inactivate RB1. We have not yet established whether PTPN14 binding is sufficient  
446 to impair differentiation or whether PTPN14 degradation has additional oncogenic effects. In  
447 either case, the identification of a mechanism by which HPV E7 controls differentiation is  
448 significant. The potential of differentiation therapy has been validated by the highly successful  
449 use of all-trans retinoic acid to treat acute promyelocytic leukemia (95). It is tantalizing to  
450 speculate that inhibiting PTPN14 inactivation could similarly restore the cellular differentiation  
451 program in HPV-positive cancer cells and have therapeutic potential. Our future work will aim to  
452 elucidate the mechanism of PTPN14 signal transduction in keratinocytes and to further  
453 characterize the role of PTPN14 degradation in HPV replication and in HPV-associated cancers.

454

## 455 **Materials and Methods**

### 456 **Cells**

457 Primary human foreskin keratinocytes (HFK) (G5-Ep isolate, gift of James Rheinwald,  
458 Harvard Medical School) and hTert-immortalized HFK (63) were cultured as previously  
459 described (96). PTPN14 knockout or nontargeting control primary HFK were established by  
460 transduction with LentiCRISPR v2 vectors (Supplemental Table 4) followed by puromycin  
461 selection. N/Tert-Cas9 cells were generated by transduction with pXPR\_111 (Addgene #59702)  
462 and blasticidin selection. PTPN14 knockout or mock control N/Tert cell lines were established  
463 by transfection of N/Tert-Cas9 with sgRNA targeting PTPN14 (Synthego, Supplemental Table  
464 4). Retroviruses and lentiviruses were generated as previously described (96).

465 To assess keratinocyte survival and changes in gene expression following detachment  
466 from a substrate, N/Tert-mock or N/Tert-sgPTPN14 cells were harvested by trypsinization and  
467 re-plated in ultra-low attachment plates (Sigma-Aldrich CLS3471). After 0 or 12h of culture in  
468 suspension cells were harvested for RNA analysis or 1000 cells were re-plated in standard 6-  
469 well tissue culture plates. Re-plated cells were stained with crystal violet 5 days post re-plating.

470 To assess the ability of HPV16 E7 variants to support keratinocyte immortalization,  
471 primary HFK were transduced with one MSCV-based retroviral vector encoding conferring  
472 puromycin resistance (HPV16 or HPV6 E6 or an empty vector control) and one retroviral vector  
473 conferring blasticidin resistance (HPV16 or HPV6 E7 or an empty vector control) (Supplemental  
474 Table 4). Cells were selected in puromycin and blasticidin and passaged for approximately 110  
475 days. Population doublings were calculated based upon the number of cells collected and re-  
476 plated at each passage.

477

### 478 **Plasmids and cloning**

479 LentiCRISPR v2 vectors were cloned according to standard protocols using sgRNA  
480 sequences as contained in the Broad Institute Brunello library (97). The E10K mutation was  
481 introduced by site-directed mutagenesis into pDONR-Kozak-16E7 and recombined into MSCV-  
482 IP N-FlagHA GAW as previously described (96). Additional HPV E6 and E7 retroviral vectors  
483 used in the study are listed in Supplemental Table 4.

484

### 485 **Western blotting**

486 Western blots were performed as previously described (47) using Mini-PROTEAN or  
487 Criterion (BioRad) SDS-PAGE gels and transfer to PVDF. Membranes were blocked in 5%  
488 nonfat dried milk in TBS-T (Tris buffered saline [pH 7.4] with 0.05% Tween-20), then incubated  
489 with primary antibodies as follows: RB1 (Calbiochem/EMD), actin (Millipore), PTPN14 (R&D  
490 Systems), and UBR4 (gift of Dr. Yoshihiro Nakatani, Dana-Farber Cancer Institute (98)).  
491 Membranes were washed in TBS-T and incubated with horseradish peroxidase (HRP)-coupled  
492 anti-mouse or anti-rabbit antibodies or an Alexa-680 coupled anti-mouse antibody and detected  
493 using Western Lightning chemiluminescent substrate or a Li-COR Infrared imaging system. HA-  
494 tagged proteins were detected using an HA antibody conjugated to HRP (Roche) and visualized

495 in the same way. For anti-HA immunoprecipitations, HA-tagged proteins were  
496 immunoprecipitated and processed for Western blot as previously described (47).

497

#### 498 **RNA-seq**

499 Total RNA was isolated from 2-3 independent isolates of HFK-control, HFK-PTPN14 KO,  
500 HFK-empty vector control, or HFK E7 cells using the RNeasy mini kit (Qiagen). PolyA selection,  
501 reverse transcription, library construction, sequencing, and initial analysis were performed by  
502 Novogene. Differentially expressed genes were selected based on a 1.5-fold change and  
503 adjusted  $p \leq 0.05$  cutoff and were analyzed for enriched biological processes (BP) using the GO  
504 enrichment analysis tool of the PANTHER classification system (99). All GO terms in  
505 enrichment analyses are displayed in rank order by adjusted  $p$ -value. RNA-seq data have been  
506 deposited in NCBI GEO with accession number GSE121906.

507

#### 508 **qRT-PCR**

509 Total RNA was isolated from N/Tert cells using the NucleoSpin RNA extraction kit  
510 (Macherey-Nagel). RNA was then reverse transcribed using the High Capacity cDNA Reverse  
511 Transcription Kit (Applied Biosystems). cDNAs were assayed by qPCR using Fast SYBR Green  
512 Master Mix (Applied Biosystems) using a QuantStudio 3 - 96-Well, 0.2 mL Block instrument  
513 (ThermoFisher). All gene RT-qPCR data were normalized to GAPDH or to G6PD. qRT-PCR  
514 primer sequences are listed in Supplemental Table 4.

515

#### 516 **Acknowledgements**

517 We thank the members of our laboratories for helpful discussions and suggestions and  
518 Yoshihiro Nakatani for the anti-UBR4 antibody. This work was supported by American Cancer

519 Society grant 131661-RSG-18-048-01-MPC to E.A.W. and by National Institutes of Health R01  
520 CA066980 to K.M.

521

## 522 **Author Contributions**

523 Conceptualization, J.H., K.M., and E.A.W.; Formal Analysis, J.H., T.J.N., B.W., I.M.M., and  
524 E.A.W.; Investigation, J.H., A.E.B., M.G., and E.A.W.; Resources, T.J.N., B.W., I.M.M., M.G.,  
525 and K.M.; Data Curation, J.H. and E.A.W.; Writing – Original Draft, J.H. and E.A.W.; Writing –  
526 Review and Editing, J.H., I.M.M., K.M., and E.A.W.; Visualization, J.H. and E.A.W.; Supervision,  
527 E.A.W.

528

## 529 **Declaration of Interests**

530 The authors declare no competing interests.

531

532 **References**

- 533 1. Doorbar J, Egawa N, Griffin H, Kranjec C, & Murakami I (2015) Human papillomavirus  
534 molecular biology and disease association. *Rev Med Virol* 25 Suppl 1:2-23.
- 535 2. Graham SV (2017) The human papillomavirus replication cycle, and its links to cancer  
536 progression: a comprehensive review. *Clin Sci (Lond)* 131(17):2201-2221.
- 537 3. McBride AA & Munger K (2018) Expert Views on HPV Infection. *Viruses* 10(2).
- 538 4. Gillison ML, Chaturvedi AK, Anderson WF, & Fakhry C (2015) Epidemiology of Human  
539 Papillomavirus-Positive Head and Neck Squamous Cell Carcinoma. *Journal of clinical  
540 oncology : official journal of the American Society of Clinical Oncology* 33(29):3235-  
541 3242.
- 542 5. Munoz N, *et al.* (2003) Epidemiologic classification of human papillomavirus types  
543 associated with cervical cancer. *N Engl J Med* 348(6):518-527.
- 544 6. Schiffman M, *et al.* (2005) The carcinogenicity of human papillomavirus types reflects  
545 viral evolution. *Virology* 337(1):76-84.
- 546 7. Halbert CL, Demers GW, & Galloway DA (1991) The E7 gene of human papillomavirus  
547 type 16 is sufficient for immortalization of human epithelial cells. *J Virol* 65(1):473-478.
- 548 8. Hawley-Nelson P, Vousden KH, Hubbert NL, Lowy DR, & Schiller JT (1989) HPV16 E6  
549 and E7 proteins cooperate to immortalize human foreskin keratinocytes. *EMBO J*  
550 8(12):3905-3910.
- 551 9. Munger K, Phelps WC, Bubb V, Howley PM, & Schlegel R (1989) The E6 and E7 genes  
552 of the human papillomavirus type 16 together are necessary and sufficient for  
553 transformation of primary human keratinocytes. *J Virol* 63(10):4417-4421.
- 554 10. Dyson N, Guida P, Munger K, & Harlow E (1992) Homologous sequences in adenovirus  
555 E1A and human papillomavirus E7 proteins mediate interaction with the same set of  
556 cellular proteins. *J Virol* 66(12):6893-6902.
- 557 11. Dyson N, Howley PM, Munger K, & Harlow E (1989) The human papilloma virus-16 E7  
558 oncoprotein is able to bind to the retinoblastoma gene product. *Science* 243(4893):934-  
559 937.
- 560 12. Munger K, *et al.* (1989) Complex formation of human papillomavirus E7 proteins with the  
561 retinoblastoma tumor suppressor gene product. *EMBO J* 8(13):4099-4105.
- 562 13. Boyer SN, Wazer DE, & Band V (1996) E7 protein of human papilloma virus-16 induces  
563 degradation of retinoblastoma protein through the ubiquitin-proteasome pathway.  
564 *Cancer Res* 56(20):4620-4624.
- 565 14. Breitkreutz A, *et al.* (2010) A global protein kinase and phosphatase interaction network  
566 in yeast. *Science* 328(5981):1043-1046.

- 567 15. Gonzalez SL, Stremmler M, He X, Basile JR, & Munger K (2001) Degradation of the  
568 retinoblastoma tumor suppressor by the human papillomavirus type 16 E7 oncoprotein is  
569 important for functional inactivation and is separable from proteasomal degradation of  
570 E7. *J Virol* 75(16):7583-7591.
- 571 16. Jones DL & Munger K (1997) Analysis of the p53-mediated G1 growth arrest pathway in  
572 cells expressing the human papillomavirus type 16 E7 oncoprotein. *J Virol* 71(4):2905-  
573 2912.
- 574 17. Funk JO, *et al.* (1997) Inhibition of CDK activity and PCNA-dependent DNA replication  
575 by p21 is blocked by interaction with the HPV-16 E7 oncoprotein. *Genes Dev*  
576 11(16):2090-2100.
- 577 18. Zerfass-Thome K, *et al.* (1996) Inactivation of the cdk inhibitor p27KIP1 by the human  
578 papillomavirus type 16 E7 oncoprotein. *Oncogene* 13(11):2323-2330.
- 579 19. Jones DL, Alani RM, & Munger K (1997) The human papillomavirus E7 oncoprotein can  
580 uncouple cellular differentiation and proliferation in human keratinocytes by abrogating  
581 p21Cip1-mediated inhibition of cdk2. *Genes Dev* 11(16):2101-2111.
- 582 20. Collins AS, Nakahara T, Do A, & Lambert PF (2005) Interactions with pocket proteins  
583 contribute to the role of human papillomavirus type 16 E7 in the papillomavirus life cycle.  
584 *J Virol* 79(23):14769-14780.
- 585 21. Duffy CL, Phillips SL, & Klingelutz AJ (2003) Microarray analysis identifies  
586 differentiation-associated genes regulated by human papillomavirus type 16 E6. *Virology*  
587 314(1):196-205.
- 588 22. Garner-Hamrick PA, *et al.* (2004) Global effects of human papillomavirus type 18 E6/E7  
589 in an organotypic keratinocyte culture system. *J Virol* 78(17):9041-9050.
- 590 23. Hudson JB, Bedell MA, McCance DJ, & Laiminis LA (1990) Immortalization and altered  
591 differentiation of human keratinocytes in vitro by the E6 and E7 open reading frames of  
592 human papillomavirus type 18. *J Virol* 64(2):519-526.
- 593 24. McCance DJ, Kopan R, Fuchs E, & Laiminis LA (1988) Human papillomavirus type 16  
594 alters human epithelial cell differentiation in vitro. *Proc Natl Acad Sci U S A* 85(19):7169-  
595 7173.
- 596 25. Nees M, *et al.* (2000) Human papillomavirus type 16 E6 and E7 proteins inhibit  
597 differentiation-dependent expression of transforming growth factor-beta2 in cervical  
598 keratinocytes. *Cancer Res* 60(15):4289-4298.
- 599 26. Zehbe I, *et al.* (2009) Human papillomavirus 16 E6 variants differ in their dysregulation of  
600 human keratinocyte differentiation and apoptosis. *Virology* 383(1):69-77.
- 601 27. Helt AM & Galloway DA (2001) Destabilization of the retinoblastoma tumor suppressor  
602 by human papillomavirus type 16 E7 is not sufficient to overcome cell cycle arrest in  
603 human keratinocytes. *J Virol* 75(15):6737-6747.



- 604 28. Jewers RJ, Hildebrandt P, Ludlow JW, Kell B, & McCance DJ (1992) Regions of human  
605 papillomavirus type 16 E7 oncoprotein required for immortalization of human  
606 keratinocytes. *J Virol* 66(3):1329-1335.
- 607 29. McIntyre MC, Frattini MG, Grossman SR, & Laimins LA (1993) Human papillomavirus  
608 type 18 E7 protein requires intact Cys-X-X-Cys motifs for zinc binding, dimerization, and  
609 transformation but not for Rb binding. *J Virol* 67(6):3142-3150.
- 610 30. White EA, *et al.* (2015) Papillomavirus e7 oncoproteins share functions with  
611 polyomavirus small T antigens. *J Virol* 89(5):2857-2865.
- 612 31. Roman A & Munger K (2013) The papillomavirus E7 proteins. *Virology* 445(1-2):138-  
613 168.
- 614 32. Ciccolini F, Di Pasquale G, Carlotti F, Crawford L, & Tommasino M (1994) Functional  
615 studies of E7 proteins from different HPV types. *Oncogene* 9(9):2633-2638.
- 616 33. Ibaraki T, Satake M, Kurai N, Ichijo M, & Ito Y (1993) Transacting activities of the E7  
617 genes of several types of human papillomavirus. *Virus Genes* 7(2):187-196.
- 618 34. Storey A, Osborn K, & Crawford L (1990) Co-transformation by human papillomavirus  
619 types 6 and 11. *J Gen Virol* 71 ( Pt 1):165-171.
- 620 35. Neary K & DiMaio D (1989) Open reading frames E6 and E7 of bovine papillomavirus  
621 type 1 are both required for full transformation of mouse C127 cells. *J Virol* 63(1):259-  
622 266.
- 623 36. Sarver N, Rabson MS, Yang YC, Byrne JC, & Howley PM (1984) Localization and  
624 analysis of bovine papillomavirus type 1 transforming functions. *J Virol* 52(2):377-388.
- 625 37. Vande Pol SB, Brown MC, & Turner CE (1998) Association of Bovine Papillomavirus  
626 Type 1 E6 oncoprotein with the focal adhesion protein paxillin through a conserved  
627 protein interaction motif. *Oncogene* 16(1):43-52.
- 628 38. Shin MK, Sage J, & Lambert PF (2012) Inactivating all three rb family pocket proteins is  
629 insufficient to initiate cervical cancer. *Cancer Res* 72(20):5418-5427.
- 630 39. Strati K & Lambert PF (2007) Role of Rb-dependent and Rb-independent functions of  
631 papillomavirus E7 oncogene in head and neck cancer. *Cancer Res* 67(24):11585-11593.
- 632 40. Munger K & Jones DL (2015) Human papillomavirus carcinogenesis: an identity crisis in  
633 the retinoblastoma tumor suppressor pathway. *J Virol* 89(9):4708-4711.
- 634 41. Todorovic B, *et al.* (2014) The human papillomavirus E7 proteins associate with  
635 p190RhoGAP and alter its function. *J Virol* 88(7):3653-3663.
- 636 42. McLaughlin-Drubin ME, Crum CP, & Munger K (2011) Human papillomavirus E7  
637 oncoprotein induces KDM6A and KDM6B histone demethylase expression and causes  
638 epigenetic reprogramming. *Proc Natl Acad Sci U S A* 108(5):2130-2135.



- 639 43. McLaughlin-Drubin ME, Park D, & Munger K (2013) Tumor suppressor p16INK4A is  
640 necessary for survival of cervical carcinoma cell lines. *Proc Natl Acad Sci U S A*  
641 110(40):16175-16180.
- 642 44. White EA, *et al.* (2012) Systematic identification of interactions between host cell  
643 proteins and E7 oncoproteins from diverse human papillomaviruses. *Proc Natl Acad Sci*  
644 *U S A* 109(5):E260-267.
- 645 45. DeMasi J, Huh KW, Nakatani Y, Munger K, & Howley PM (2005) Bovine papillomavirus  
646 E7 transformation function correlates with cellular p600 protein binding. *Proc Natl Acad*  
647 *Sci U S A* 102(32):11486-11491.
- 648 46. Huh KW, *et al.* (2005) Association of the human papillomavirus type 16 E7 oncoprotein  
649 with the 600-kDa retinoblastoma protein-associated factor, p600. *Proc Natl Acad Sci U S*  
650 *A* 102(32):11492-11497.
- 651 47. White EA, Munger K, & Howley PM (2016) High-Risk Human Papillomavirus E7 Proteins  
652 Target PTPN14 for Degradation. *MBio* 7(5).
- 653 48. Au AC, *et al.* (2010) Protein tyrosine phosphatase PTPN14 is a regulator of lymphatic  
654 function and choanal development in humans. *American journal of human genetics*  
655 87(3):436-444.
- 656 49. Poernbacher I, Baumgartner R, Marada SK, Edwards K, & Stocker H (2012) *Drosophila*  
657 *Pez* acts in Hippo signaling to restrict intestinal stem cell proliferation. *Curr Biol*  
658 22(5):389-396.
- 659 50. Wyatt L, Wadham C, Crocker LA, Lardelli M, & Khew-Goodall Y (2007) The protein  
660 tyrosine phosphatase *Pez* regulates TGFbeta, epithelial-mesenchymal transition, and  
661 organ development. *J Cell Biol* 178(7):1223-1235.
- 662 51. Benzinou M, *et al.* (2012) Mouse and human strategies identify PTPN14 as a modifier of  
663 angiogenesis and hereditary haemorrhagic telangiectasia. *Nature communications*  
664 3:616.
- 665 52. Smith AL, *et al.* (1995) *Pez*: a novel human cDNA encoding protein tyrosine  
666 phosphatase- and ezrin-like domains. *Biochemical and biophysical research*  
667 *communications* 209(3):959-965.
- 668 53. Belle L, *et al.* (2015) The tyrosine phosphatase PTPN14 (*Pez*) inhibits metastasis by  
669 altering protein trafficking. *Sci Signal* 8(364):ra18.
- 670 54. Bonilla X, *et al.* (2016) Genomic analysis identifies new drivers and progression  
671 pathways in skin basal cell carcinoma. *Nat Genet* 48(4):398-406.
- 672 55. Wilson KE, *et al.* (2014) PTPN14 forms a complex with Kibra and LATS1 proteins and  
673 negatively regulates the YAP oncogenic function. *J Biol Chem* 289(34):23693-23700.
- 674 56. Zhang P, *et al.* (2013) Identification and functional characterization of p130Cas as a  
675 substrate of protein tyrosine phosphatase nonreceptor 14. *Oncogene* 32(16):2087-2095.

- 676 57. Wang Z, *et al.* (2004) Mutational analysis of the tyrosine phosphatome in colorectal  
677 cancers. *Science* 304(5674):1164-1166.
- 678 58. Wadham C, Gamble JR, Vadas MA, & Khew-Goodall Y (2003) The protein tyrosine  
679 phosphatase Pez is a major phosphatase of adherens junctions and dephosphorylates  
680 beta-catenin. *Mol Biol Cell* 14(6):2520-2529.
- 681 59. Liu X, *et al.* (2013) PTPN14 interacts with and negatively regulates the oncogenic  
682 function of YAP. *Oncogene* 32(10):1266-1273.
- 683 60. Michaloglou C, *et al.* (2013) The tyrosine phosphatase PTPN14 is a negative regulator  
684 of YAP activity. *PLoS One* 8(4):e61916.
- 685 61. Wang W, *et al.* (2012) PTPN14 is required for the density-dependent control of YAP1.  
686 *Genes Dev* 26(17):1959-1971.
- 687 62. Mirabello L, *et al.* (2017) HPV16 E7 Genetic Conservation Is Critical to Carcinogenesis.  
688 *Cell* 170(6):1164-1174.e1166.
- 689 63. Dickson MA, *et al.* (2000) Human keratinocytes that express hTERT and also bypass a  
690 p16(INK4a)-enforced mechanism that limits life span become immortal yet retain normal  
691 growth and differentiation characteristics. *Mol Cell Biol* 20(4):1436-1447.
- 692 64. Adams JC & Watt FM (1989) Fibronectin inhibits the terminal differentiation of human  
693 keratinocytes. *Nature* 340(6231):307-309.
- 694 65. Banno T & Blumenberg M (2014) Keratinocyte detachment-differentiation connection  
695 revisited, or anoikis-pityriasis nexus redux. *PLoS One* 9(6):e100279.
- 696 66. Green H (1977) Terminal differentiation of cultured human epidermal cells. *Cell*  
697 11(2):405-416.
- 698 67. DeMasi J, Chao MC, Kumar AS, & Howley PM (2007) Bovine papillomavirus E7  
699 oncoprotein inhibits anoikis. *J Virol* 81(17):9419-9425.
- 700 68. Totaro A, *et al.* (2017) YAP/TAZ link cell mechanics to Notch signalling to control  
701 epidermal stem cell fate. *Nature communications* 8:15206.
- 702 69. Zhao B, *et al.* (2012) Cell detachment activates the Hippo pathway via cytoskeleton  
703 reorganization to induce anoikis. *Genes Dev* 26(1):54-68.
- 704 70. Klein RH, *et al.* (2017) GRHL3 binding and enhancers rearrange as epidermal  
705 keratinocytes transition between functional states. *PLoS genetics* 13(4):e1006745.
- 706 71. Lopez-Pajares V, *et al.* (2015) A LncRNA-MAF:MAFB transcription factor network  
707 regulates epidermal differentiation. *Dev Cell* 32(6):693-706.
- 708 72. Miyai M, *et al.* (2016) Transcription Factor MafB Coordinates Epidermal Keratinocyte  
709 Differentiation. *J Invest Dermatol* 136(9):1848-1857.

- 710 73. Miyai M, *et al.* (2017) Ectopic expression of the transcription factor MafB in basal  
711 keratinocytes induces hyperproliferation and perturbs epidermal homeostasis.  
712 *Experimental dermatology* 26(11):1039-1045.
- 713 74. Yu Z, *et al.* (2006) The Grainyhead-like epithelial transactivator Get-1/Grh13 regulates  
714 epidermal terminal differentiation and interacts functionally with LMO4. *Developmental*  
715 *biology* 299(1):122-136.
- 716 75. Nulton TJ, Olex AL, Dozmorov M, Morgan IM, & Windle B (2017) Analysis of The Cancer  
717 Genome Atlas sequencing data reveals novel properties of the human papillomavirus 16  
718 genome in head and neck squamous cell carcinoma. *Oncotarget* 8(11):17684-17699.
- 719 76. Evans MR, *et al.* (2017) An oral keratinocyte life cycle model identifies novel host  
720 genome regulation by human papillomavirus 16 relevant to HPV positive head and neck  
721 cancer. *Oncotarget* 8(47):81892-81909.
- 722 77. Evans MR, *et al.* (2018) Human papillomavirus 16 E2 regulates keratinocyte gene  
723 expression relevant to cancer and the viral life cycle. *bioRxiv*.
- 724 78. Mehra R, *et al.* (2016) Biallelic Alteration and Dysregulation of the Hippo Pathway in  
725 Mucinous Tubular and Spindle Cell Carcinoma of the Kidney. *Cancer Discov* 6(11):1258-  
726 1266.
- 727 79. Mello SS, *et al.* (2017) A p53 Super-tumor Suppressor Reveals a Tumor Suppressive  
728 p53-Ptpn14-Yap Axis in Pancreatic Cancer. *Cancer Cell* 32(4):460-473.e466.
- 729 80. Pellegrini C, *et al.* (2017) Understanding the Molecular Genetics of Basal Cell  
730 Carcinoma. *International journal of molecular sciences* 18(11).
- 731 81. Schramm A, *et al.* (2015) Mutational dynamics between primary and relapse  
732 neuroblastomas. *Nat Genet* 47(8):872-877.
- 733 82. Scheffner M, Werness BA, Huibregtse JM, Levine AJ, & Howley PM (1990) The E6  
734 oncoprotein encoded by human papillomavirus types 16 and 18 promotes the  
735 degradation of p53. *Cell* 63(6):1129-1136.
- 736 83. Werness BA, Levine AJ, & Howley PM (1990) Association of human papillomavirus  
737 types 16 and 18 E6 proteins with p53. *Science* 248(4951):76-79.
- 738 84. Szalmas A, *et al.* (2017) The PTPN14 Tumor Suppressor Is a Degradation Target of  
739 Human Papillomavirus E7. *J Virol* 91(7).
- 740 85. Huang JM, *et al.* (2013) YAP modifies cancer cell sensitivity to EGFR and survivin  
741 inhibitors and is negatively regulated by the non-receptor type protein tyrosine  
742 phosphatase 14. *Oncogene* 32(17):2220-2229.
- 743 86. Perez CA, Ott J, Mays DJ, & Pietenpol JA (2007) p63 consensus DNA-binding site:  
744 identification, analysis and application into a p63MH algorithm. *Oncogene* 26(52):7363-  
745 7370.

- 746 87. Armstrong SR, *et al.* (2016) The Regulation of Tumor Suppressor p63 by the Ubiquitin-  
747 Proteasome System. *International journal of molecular sciences* 17(12).
- 748 88. Sethi I, Gluck C, Zhou H, Buck MJ, & Sinha S (2017) Evolutionary re-wiring of p63 and  
749 the epigenomic regulatory landscape in keratinocytes and its potential implications on  
750 species-specific gene expression and phenotypes. *Nucleic Acids Res* 45(14):8208-8224.
- 751 89. Soares E & Zhou H (2017) Master regulatory role of p63 in epidermal development and  
752 disease. *Cell Mol Life Sci*.
- 753 90. Harden ME, Prasad N, Griffiths A, & Munger K (2017) Modulation of microRNA-mRNA  
754 Target Pairs by Human Papillomavirus 16 Oncoproteins. *MBio* 8(1).
- 755 91. Wong CF, *et al.* (2003) E2F modulates keratinocyte squamous differentiation:  
756 implications for E2F inhibition in squamous cell carcinoma. *J Biol Chem* 278(31):28516-  
757 28522.
- 758 92. Brimer N, Lyons C, Wallberg AE, & Vande Pol SB (2012) Cutaneous papillomavirus E6  
759 oncoproteins associate with MAML1 to repress transactivation and NOTCH signaling.  
760 *Oncogene* 31.
- 761 93. Meyers JM, Spangle JM, & Munger K (2013) The human papillomavirus type 8 E6  
762 protein interferes with NOTCH activation during keratinocyte differentiation. *J Virol*  
763 87(8):4762-4767.
- 764 94. Tan MJ, *et al.* (2012) Cutaneous beta-human papillomavirus E6 proteins bind  
765 Mastermind-like coactivators and repress Notch signaling. *Proc Natl Acad Sci U S A*  
766 109(23):E1473-1480.
- 767 95. Ablain J & de The H (2014) Retinoic acid signaling in cancer: The parable of acute  
768 promyelocytic leukemia. *Int J Cancer* 135(10):2262-2272.
- 769 96. White EA, *et al.* (2012) Comprehensive analysis of host cellular interactions with human  
770 papillomavirus E6 proteins identifies new E6 binding partners and reflects viral diversity.  
771 *J Virol* 86(24):13174-13186.
- 772 97. Doench JG, *et al.* (2016) Optimized sgRNA design to maximize activity and minimize off-  
773 target effects of CRISPR-Cas9. *Nature biotechnology* 34(2):184-191.
- 774 98. Nakatani Y, *et al.* (2005) p600, a unique protein required for membrane morphogenesis  
775 and cell survival. *Proc Natl Acad Sci U S A* 102(42):15093-15098.
- 776 99. Mi H, *et al.* (2017) PANTHER version 11: expanded annotation data from Gene  
777 Ontology and Reactome pathways, and data analysis tool enhancements. *Nucleic Acids*  
778 *Res* 45(D1):D183-d189.
- 779

780 **Figure Legends**

781 **Figure 1. The HPV16 E10K variant is impaired in PTPN14 degradation but binds RB1 and**  
782 **promotes the expression of E2F-regulated genes.**

783 (A) Schematic of protein complexes including HPV E7/RB1 and HPV E7/PTPN14/UBR4. (B)  
784 N/Tert-1 keratinocytes were transduced with control and HPV16 E7 retroviruses. Total cell  
785 lysates were analyzed by SDS-PAGE/Western blotting and probed with antibodies to PTPN14,  
786 RB1, HA, and actin (top). HPV16 E7-FlagHA was immunoprecipitated with anti-HA from N/Tert  
787 lysates and co-immunoprecipitation of UBR4 and RB1 was assessed by SDS-PAGE/Western  
788 blotting (bottom). (C) qRT-PCR for E2F-regulated genes in primary HFK transduced with control  
789 and HPV16 E7 retroviruses. Bar graphs display the mean  $\pm$  standard deviation of 2 (16E7  $\Delta$ 21-  
790 24) or 3 (EV, 16E7 WT, and 16E7 E10K) independent experiments. Statistical significance was  
791 determined by ANOVA followed by multiple t-tests with the Holm-Šídák family-wise error rate  
792 correction (\*\* =  $p < 0.01$ ; \*\*\* =  $p < 0.001$ ; \*\*\*\* =  $p < 0.0001$ ).

793

794 **Figure 2. HPV16 E7-mediated degradation of PTPN14 inhibits keratinocyte differentiation.**

795 Primary HFK were transduced with retroviruses encoding HPV16 E7, HPV16 E7 E10K, HPV16  
796 E7  $\Delta$ 21-24, or an empty vector control. PolyA selected RNA was analyzed by RNA-seq. (A) GO  
797 enrichment analysis of genes with  $\geq 1.5$  fold lower expression in HPV16 E7 WT cells relative to  
798 HPV16 E7 E10K cells and  $p$ -value  $\leq 0.05$ . (B) Scatter plot of  $\log_2(\text{fold-change})$  in gene  
799 expression compares the gene expression changes of HPV16 E7 E10K relative to HPV16 E7  
800 WT to those of PTPN14 KO relative to control. Colors denote whether genes are altered by  
801 PTPN14 KO only (blue), by E7 WT more than E7 E10K only (light red), or both (dark red). (C)  
802 Same analysis as (A) of (C, Top) genes with  $\geq 1.5$  fold higher expression in HPV16 E7 WT than  
803 HPV16 E7  $\Delta$ 21-24 cells, and (C, Bottom) genes  $\geq 1.5$  fold lower expression in HPV16 E7  $\Delta$ 21-24  
804 cells relative to empty vector control cells and  $p$ -value  $\leq 0.05$ . (D) Impacts of HPV16 E7 WT,

805 HPV16 E7 E10K, and HPV16 E7  $\Delta$ 21-24 on gene expression in primary HFK cells were  
806 validated by qRT-PCR targeting markers of differentiation. Bar graphs display the mean  $\pm$   
807 standard deviation of 2 (16E7  $\Delta$ 21-24) or 3 (EV, 16E7 WT, and 16E7 E10K) independent  
808 experiments. Statistical significance was determined by ANOVA followed by multiple t-tests with  
809 the Holm-Šídák family-wise error rate correction (\* =  $p < 0.05$ ; \*\* =  $p < 0.01$ ; \*\*\* =  $p < 0.001$ ).

810

811 **Figure 3. The ability of E7 to degrade PTPN14 correlates with its ability to inhibit**  
812 **differentiation and promote survival upon detachment.**

813 N/Tert-1 stably transduced with retroviruses encoding HPV16 E7, HPV16 E7 E10K, HPV6 E7,  
814 or an empty vector control were subjected to growth in suspension for 12h and assayed for  
815 markers of differentiation, YAP/TEAD targets, and survival after detachment. (A and B) Gene  
816 expression changes induced by suspension were assayed by qRT-PCR targeting markers of  
817 differentiation: KRT16 and IVL (A), and YAP/TEAD targets: CTGF and CYR61 (B). mRNA  
818 expression was calculated relative to GAPDH. Bar graphs display the mean  $\pm$  standard  
819 deviation of 3 independent experiments. (C) Survival after detachment was assayed by re-  
820 plating 1,000 cells from suspension and measuring the surface area covered after 5 days of  
821 growth by crystal violet staining. Three independent experiments are displayed along with mean  
822  $\pm$  standard deviation. Statistical significance was determined by ANOVA followed by multiple t-  
823 tests with the Holm-Šídák family-wise error rate correction (\* =  $p < 0.05$ ; \*\* =  $p < 0.01$ )

824

825 **Figure 4. PTPN14 depletion impairs differentiation-related gene expression in primary**  
826 **human keratinocytes.**

827 Primary HFK were transduced with LentiCRISPRv2 lentiviral vectors encoding SpCas9 and  
828 non-targeting or PTPN14-directed sgRNAs and analyzed for changes in gene expression. (A)  
829 Cell lysates were subjected to SDS-PAGE/Western analysis and probed with anti-PTPN14 and  
830 anti-actin antibodies. (B) PolyA selected RNA was analyzed by RNA-seq. Genes differentially



831 expressed by  $\geq 1.5$  fold with  $p$ -value  $\leq 0.05$  are displayed in the heat map. Color coding on the  
832 right side denotes whether genes are related to epidermis development (blue), other  
833 developmental processes (green), or neither (gray). (C) GO enrichment analysis of genes  
834 downregulated in HFK-PTPN14 KO compared to HFK-control. (D) Volcano plot of gene  
835 expression changes in HFK-control vs HFK-PTPN14 KO. Dots colored by GO terms. Pie chart  
836 displays the fraction of genes down regulated in the absence of PTPN14 that fall into enriched  
837 GO Terms. (E, F, and G) Transcript abundance for selected genes in HFK-control and HFK-  
838 PTPN14 KO was measured by qRT-PCR detecting differentiation markers (E), differentiation  
839 promoting transcription factors (F), and YAP/TEAD targets (G). Bar graphs display the mean  $\pm$   
840 standard deviation of 2 or 3 independent experiments. Statistical significance was determined  
841 by Welch's t-tests (\* =  $p < 0.05$ ; \*\* =  $p < 0.01$ ).

842

843 **Figure 5. PTPN14 loss reduces the expression of differentiation markers after**  
844 **detachment.**

845 Adherent N/Tert-mock and -PTPN14 KO cells were detached by trypsinization and re-plated in  
846 ultra-low adherence plates before harvesting 12h post detachment, then assayed for markers of  
847 differentiation, YAP/TEAD targets, and survival after detachment. (A and B) Gene expression  
848 changes induced by suspension were assayed by qRT-PCR targeting markers of differentiation:  
849 KRT16 and IVL (A), and YAP/TEAD targets: CTGF and CYR61 (B). mRNA expression was  
850 calculated relative to GAPDH. Bar graphs display the mean  $\pm$  standard deviation of 3  
851 independent experiments. (C) Survival after detachment was assessed by re-plating 1,000 cells  
852 from suspension, allowing cells to grow for 5 days, and measuring total viable cell area by  
853 crystal violet staining. Three independent experiments are displayed along with mean  $\pm$   
854 standard deviation. Statistical significance was determined by ANOVA followed by multiple t-  
855 tests with the Holm-Šídák family-wise error rate correction (\* =  $p < 0.05$ ; \*\* =  $p < 0.01$ ; \*\*\* =  $p$   
856  $< 0.001$ )

857

858 **Figure 6. PTPN14 degradation contributes to E6/E7 immortalization of primary human**  
859 **keratinocytes.**

860 Primary HFK cells were transduced with pairs of retroviruses encoding various E6 and E7 and  
861 passaged for up to 75 days. (A) Growth curves from representative immortalization experiment.  
862 Population doublings were calculated based upon the number of cells harvested at each  
863 passage. Statistical significance was determined from 3 independent experiments by repeated  
864 measures two-way ANOVA. Displayed  $p$ -values represent the column (cell line) factor (\* =  $p <$   
865  $0.05$ ; \*\* =  $p < 0.01$ ). (B) Bar chart shows mean  $\pm$  standard deviation of selected passages from  
866 growth curves in (A).

867

868 **Figure 7. Keratinocyte differentiation gene signature describes the major differences**  
869 **between HPV+ and HPV- HNSCC.**

870 Data from HNSCC samples on the TCGA database were determined to be HPV+ or HPV- and  
871 analyzed for differences in gene expression. (A) Bar chart portrays the ranked  $-\text{Log}_{10}(p\text{-values})$   
872 of enriched gene ontology terms among genes down-regulated in HPV+ HNSCC. Pie chart  
873 displays fraction of total down-regulated genes that fall into selected gene ontology categories.

874

875 **Supplemental Figure and Table Legends**

876 **Supplemental Figure 1. The HPV16 E10K variant is impaired in PTPN14 degradation but**  
877 **binds RB1 and promotes cell cycle progression.**

878 Primary HFK were transduced with retroviruses encoding HPV16 E7 WT, HPV16 E7 E10K,  
879 HPV16 E7  $\Delta 21-24$ , or an empty vector control. RNA from transduced cells was polyA selected  
880 and analyzed by RNA-seq for changes in gene expression. (A) Heat map displays top 75 genes  
881 differentially expressed in HPV16 E7 $\Delta 21-24$  relative to HPV16 E7 WT cells. (B) Genes in the



882 DNA Replication GO Term (GO0006260) altered by HPV16 E7 WT relative to control  $\geq 1.5$  fold  
883 with  $p$ -value  $\leq 0.05$  are displayed in heat map.

884

885 **Supplemental Figure 2. HPV 16E7 degrades PTPN14 to inhibit keratinocyte**  
886 **differentiation.**

887 Primary HFK were transduced with retroviruses encoding HPV16 E7 WT, HPV16 E7 E10K,  
888 HPV16 E7  $\Delta 21-24$ , or an empty vector control. RNA from transduced cells was polyA selected  
889 and analyzed by RNA-seq for changes in gene expression. (A) GO enrichment analysis of  
890 genes  $> 1.5$  fold higher with  $p < 0.05$  in HPV16 E7 WT relative to HPV 16 E7 E10K shows no  
891 strong enrichment for GO terms. (B) Same analysis as (A) of (C, Top) genes with  $\geq 1.5$  fold lower  
892 expression in HPV16 E7 WT than HPV16 E7  $\Delta 21-24$  cells, and (C, Bottom) genes  $\geq 1.5$  fold  
893 higher expression in HPV16 E7  $\Delta 21-24$  cells relative to empty vector control cells and  $p$ -value  
894  $\leq 0.05$ . (C) Scatter plot of  $\log_2(\text{fold-change})$  in gene expression compares the gene expression  
895 changes of HPV16 E7  $\Delta 21-24$  relative to empty vector control to those of PTPN14 KO relative  
896 to control. Colors denote whether genes are altered by PTPN14 KO only (blue), by HPV16 E7  
897  $\Delta 21-24$  only (light green), or both (dark green). (D) Unbiased clustering of genes that are lower  
898 in HPV16 E7 WT cells relative to HPV16 E7 E10K by  $\geq 1.5$  fold with  $p$ -value  $\leq 0.05$  in HPV16 E7.  
899 Gene names and clustering are displayed to the left of the heat map, and selected GO  
900 categories are displayed on the right. Color coding on the right side denotes whether genes in a  
901 cluster are related to epidermis development (blue), other developmental processes (green), or  
902 neither (gray).

903

904 **Supplemental Figure 3: PTPN14 depletion upregulates inflammatory response genes in**  
905 **primary human keratinocytes and down regulates similar keratinocyte differentiation**  
906 **genes to HPV16 E7.**

907 Primary HFK were transduced with LentiCRISPRv2 lentiviral vectors encoding SpCas9 and  
908 non-targeting or PTPN14-directed sgRNAs and analyzed for changes in gene expression. PolyA  
909 selected RNA was analyzed by RNA-seq. Plot displays GO enrichment analysis of genes  
910 upregulated in HFK-PTPN14 KO compared to HFK-control.

911

912 **Supplemental Figure 4. Keratinocyte differentiation gene signature describes the major**  
913 **differences between HPV+ and HPV- HNSCC.**

914 Data from HNSCC samples on the TCGA database were determined to be HPV+ or HPV- and  
915 analyzed for differences in gene expression. (A) Bar chart portrays the ranked  $-\text{Log}_{10}(\text{p-values})$   
916 of enriched gene ontology terms among genes up-regulated in HPV+ HNSCC.

917

918 **Supplemental Table 1. The HPV16 E10K variant is impaired in PTPN14 degradation but**  
919 **binds RB1 and promotes the expression of E2F-regulated genes.**

920 Primary HFK were transduced with retroviruses encoding HPV16 E7 WT, HPV16 E7 E10K,  
921 HPV16 E7  $\Delta$ 21-24, or an empty vector control. RNA from transduced cells was polyA selected  
922 and analyzed by RNA-seq for changes in gene expression. (A) Table includes top 75 genes  
923 significantly altered by HPV16 E7  $\Delta$ 21-24 relative to HPV16 E7 WT. (B) Table displays the  
924 genes in the DNA Replication GO Term (GO0006260) that are altered by  $\geq 1.5$  fold with p-value  
925  $\leq 0.05$  in HPV16 E7 WT cells relative to vector control cells. Tables include gene name,  
926  $\log_2(\text{fold change})$ , and adjusted p-value for HPV16 E7 E10K and HPV16 E7  $\Delta$ 21-24 relative to  
927 HPV 16 E7 WT.

928

929 **Supplemental Table 2. HPV 16E7 degrades PTPN14 to inhibit keratinocyte differentiation.**

930 Primary HFK were transduced with retroviruses encoding HPV16 E7 WT, HPV16 E7 E10K,  
931 HPV16 E7  $\Delta$ 21-24, or an empty vector control. RNA from transduced cells was polyA selected

932 and analyzed by RNA-seq. (A) Table includes gene name, log<sub>2</sub>(fold change), and adjusted p-  
933 value for genes altered by ≥1.5 fold with *p*-value ≤0.05 in HPV16 E7 WT relative to HPV16 E7  
934 E10K. (B) Table includes gene name, log<sub>2</sub>(fold change), and adjusted p-value for genes altered  
935 by ≥1.5 fold with *p*-value ≤0.05 in HPV16 E7 Δ21-24 relative to empty vector control.

936

937 **Supplemental Table 3: PTPN14 depletion impairs differentiation-related gene expression**  
938 **in primary human keratinocytes.**

939 Primary HFK were transduced with LentiCRISPRv2 lentiviral vectors encoding SpCas9 and  
940 non-targeting or PTPN14-directed sgRNAs and polyA selected RNA was analyzed by RNA-seq.  
941 Table includes gene name, log<sub>2</sub>(fold change), and adjusted p-value for genes differentially  
942 expressed by ≥1.5 fold with p-value ≤0.05.

943

944 **Supplemental Table 4: Plasmids and primers used in the study.**

945



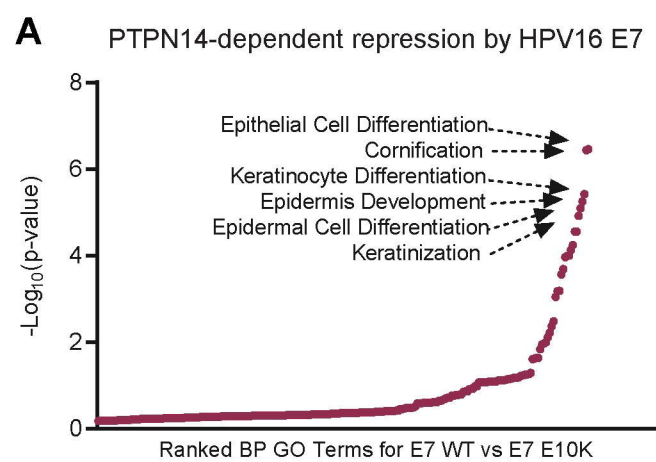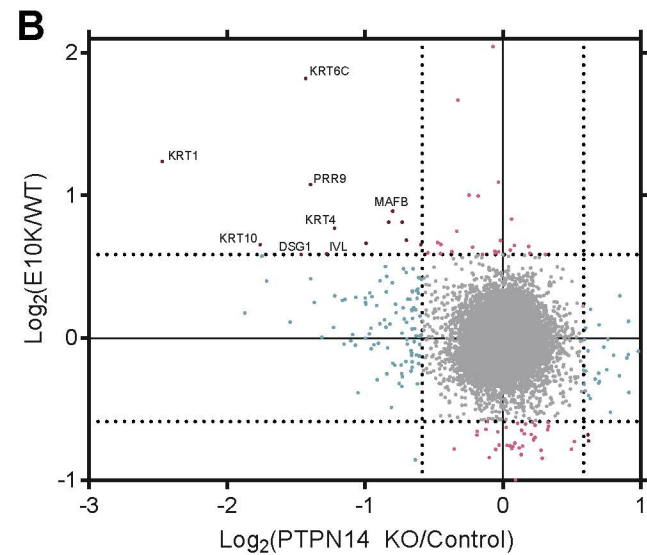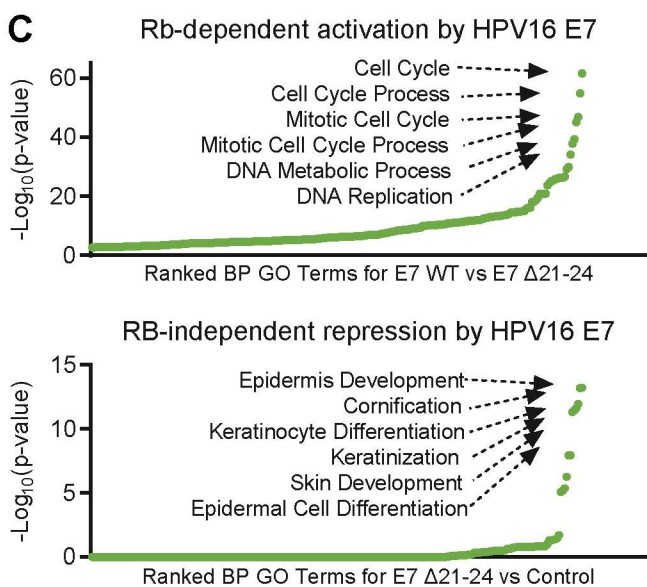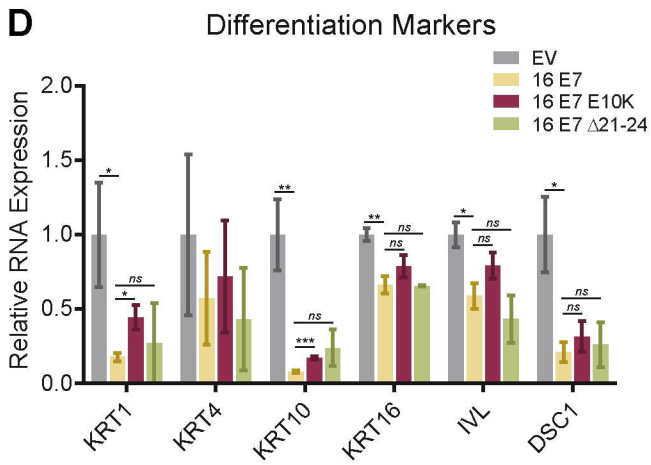

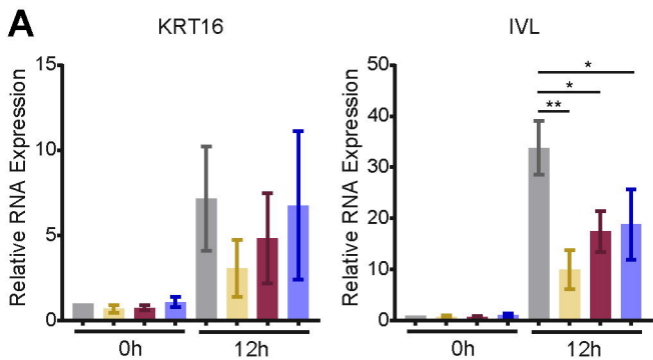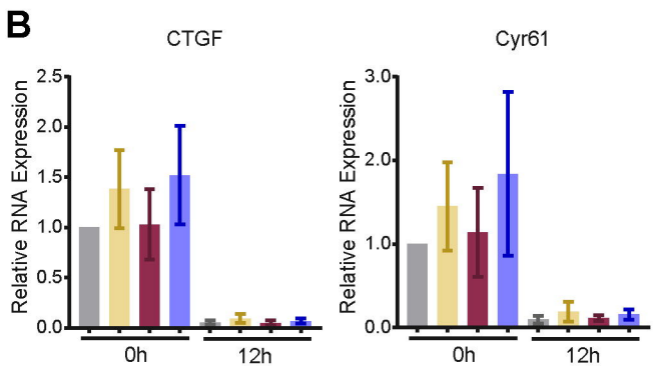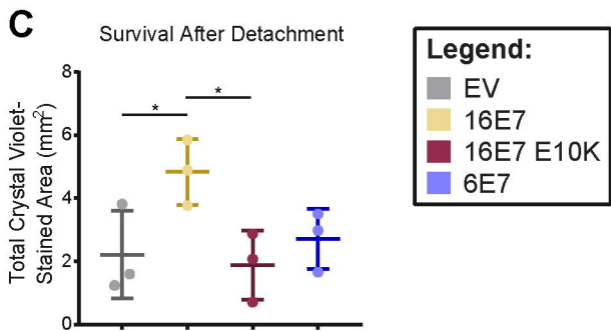

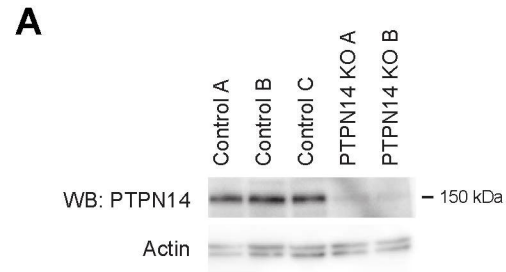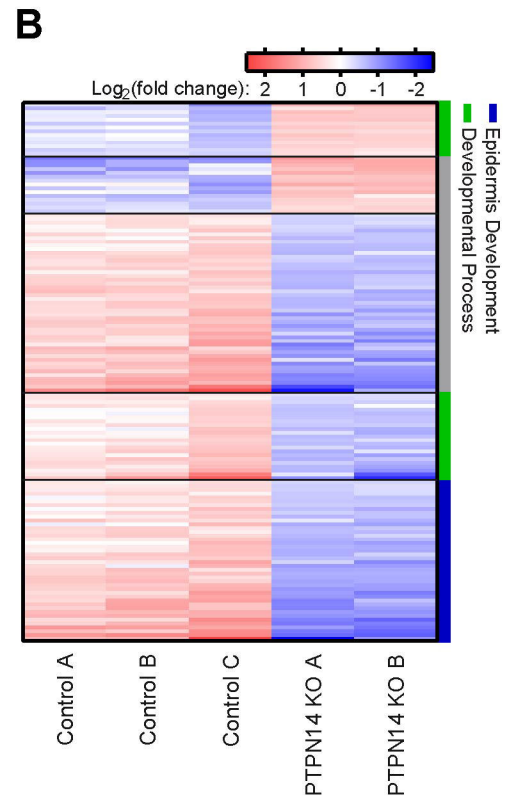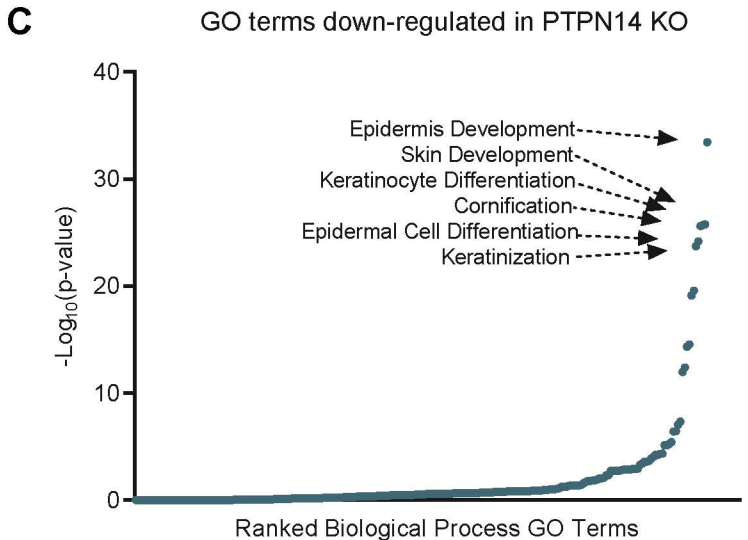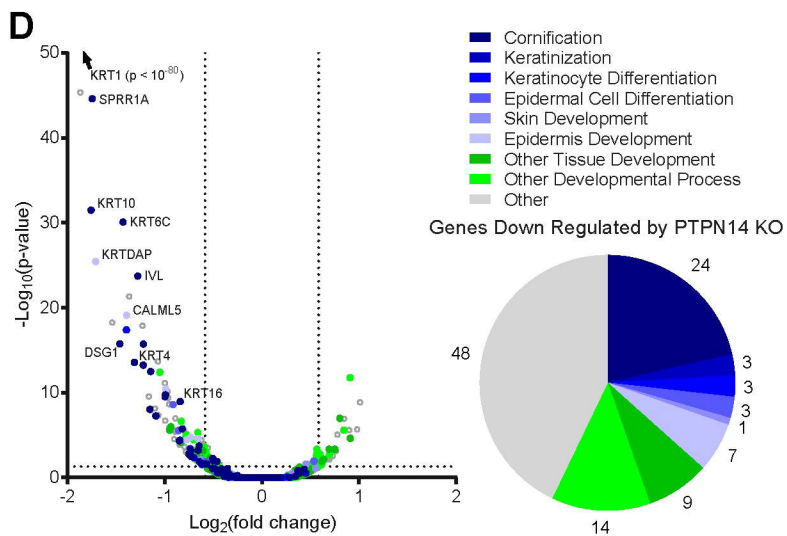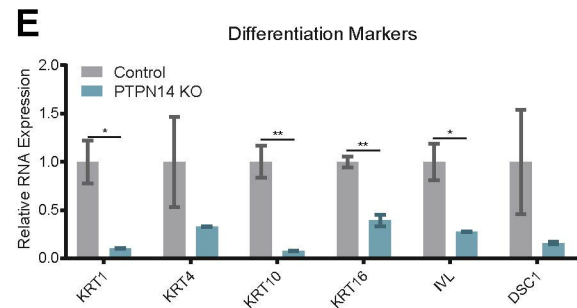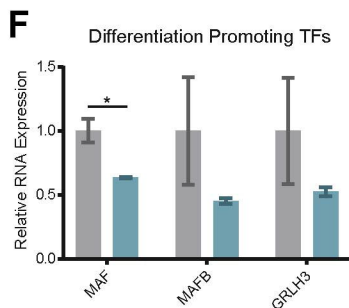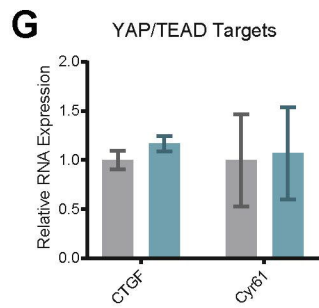

**A**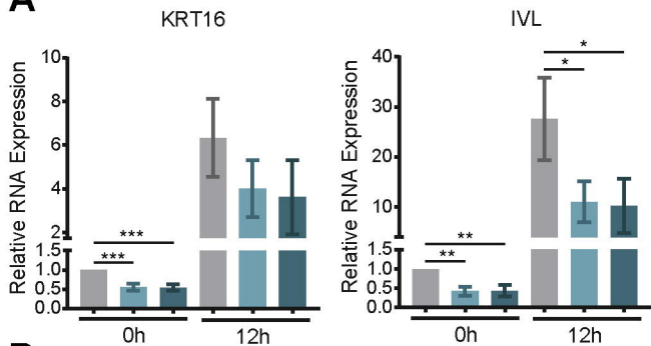**B**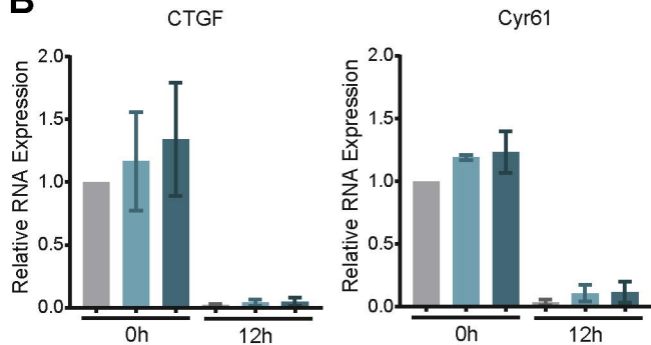**C**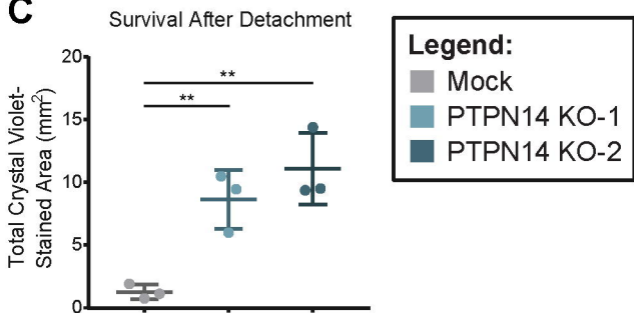**Legend:**

Mock

PTPN14 KO-1

PTPN14 KO-2



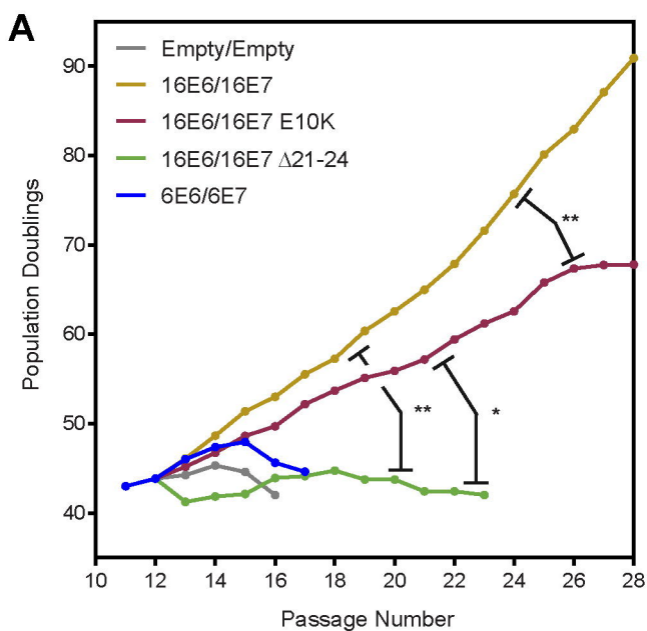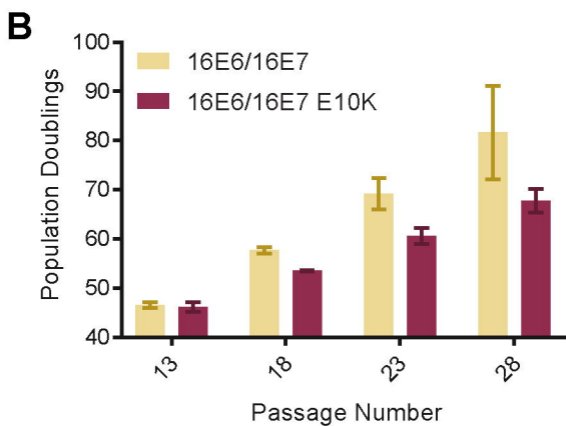

# A GO Terms Down-Regulated in HPV+ vs HPV- HNSCC

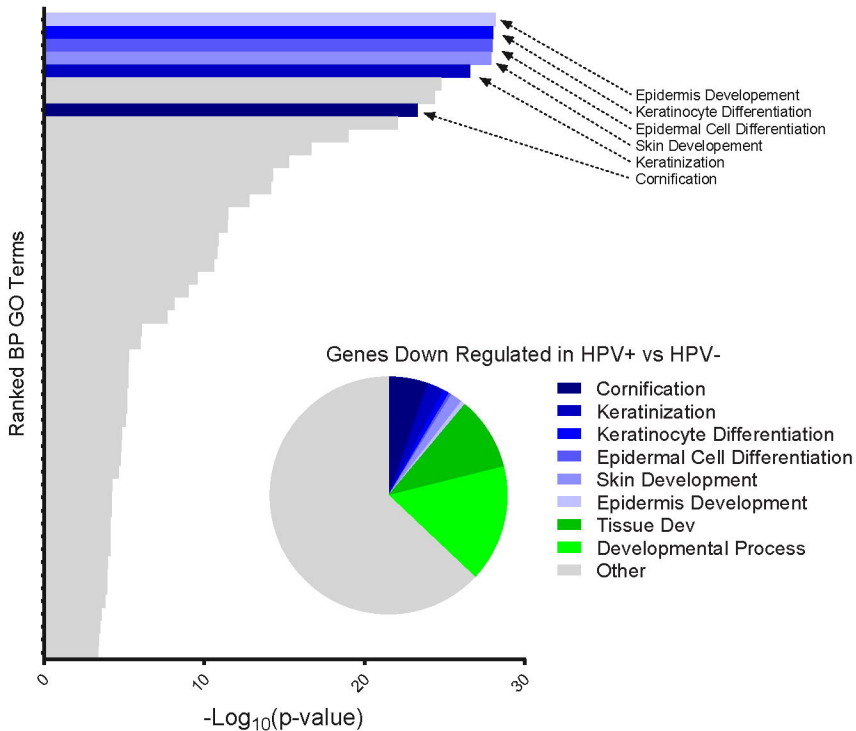

Source: http://biorxiv.org/content/10.1101/471045v1.full.pdf
